# Supplementary material for: Microevolutionary traits and comparative population genomics of the emerging pathogenic fungus Cryptococcus gattii
Source: Philos Trans R Soc Lond B Biol Sci. 2016 Dec 5;371(1709):20160021. doi: 10.1098/rstb.2016.0021 (PMC5095545; doi:10.1098/rstb.2016.0021)
Supplement: Genetic differences [file rstb20160021supp3.xlsx]

## Sheet: Sheet1
	Locus ID	Annotation	PFAM numbers	PFAM description(s)
	CNBG_4495	hypothetical protein	PF00172.13	Fungal Zn(2)-Cys(6) binuclear cluster domain
	CNBG_4494	hypothetical protein	PF00107.21, PF08240.7	Zinc-binding dehydrogenase, Alcohol dehydrogenase GroES-like domain
	CNBG_9475	hypothetical protein	none
	CNBG_9652	hypothetical protein	none
	CNBG_2933	hypothetical protein	PF00107.21, PF08240.7	Zinc-binding dehydrogenase, Alcohol dehydrogenase GroES-like domain
	CNBG_9396	hypothetical protein	PF02698.12	DUF218 domain
	CNBG_3719	deoxyribose-phosphate aldolase	PF01791.4	DeoC/LacD family aldolase
	CNBG_3720	hypothetical protein	PF00232.13	Glycosyl hydrolase family 1
	CNBG_4493	oxidoreductase	PF00248.16	Aldo/keto reductase family
	CNBG_9309	hypothetical protein	none
	CNBG_9476	hypothetical protein	PF12904.2, PF13204.1	Putative collagen-binding domain of a collagenase, Protein of unknown function (DUF4038)
	CNBG_9477	hypothetical protein	PF07690.11, PF13347.1, PF00083.19	Major Facilitator Superfamily, MFS/sugar transport protein, Sugar (and other) transporter
	CNBG_4491	hypothetical protein	PF07690.11, PF00083.19	MFS_1[Major Facilitator Superfamily, Sugar_tr[Sugar (and other) transporter
	CNBG_9678	hypothetical protein	none
	CNBG_3718	hypothetical protein	PF04082.13, PF00172.13	Fungal specific transcription factor domain, Fungal Zn(2)-Cys(6) binuclear cluster domain
	CNBG_4492	hypothetical protein	PF00107.21, PF08240.7	Zinc-binding dehydrogenase, Alcohol dehydrogenase GroES-like domain
